# Supplementary material
Source: PubMed Central journal article supplement (PMC7719145)
Supplement: 12264_2020_518_MOESM1_ESM.pdf [file 12264_2020_518_MOESM1_ESM.pdf]

# Supplementary Materials

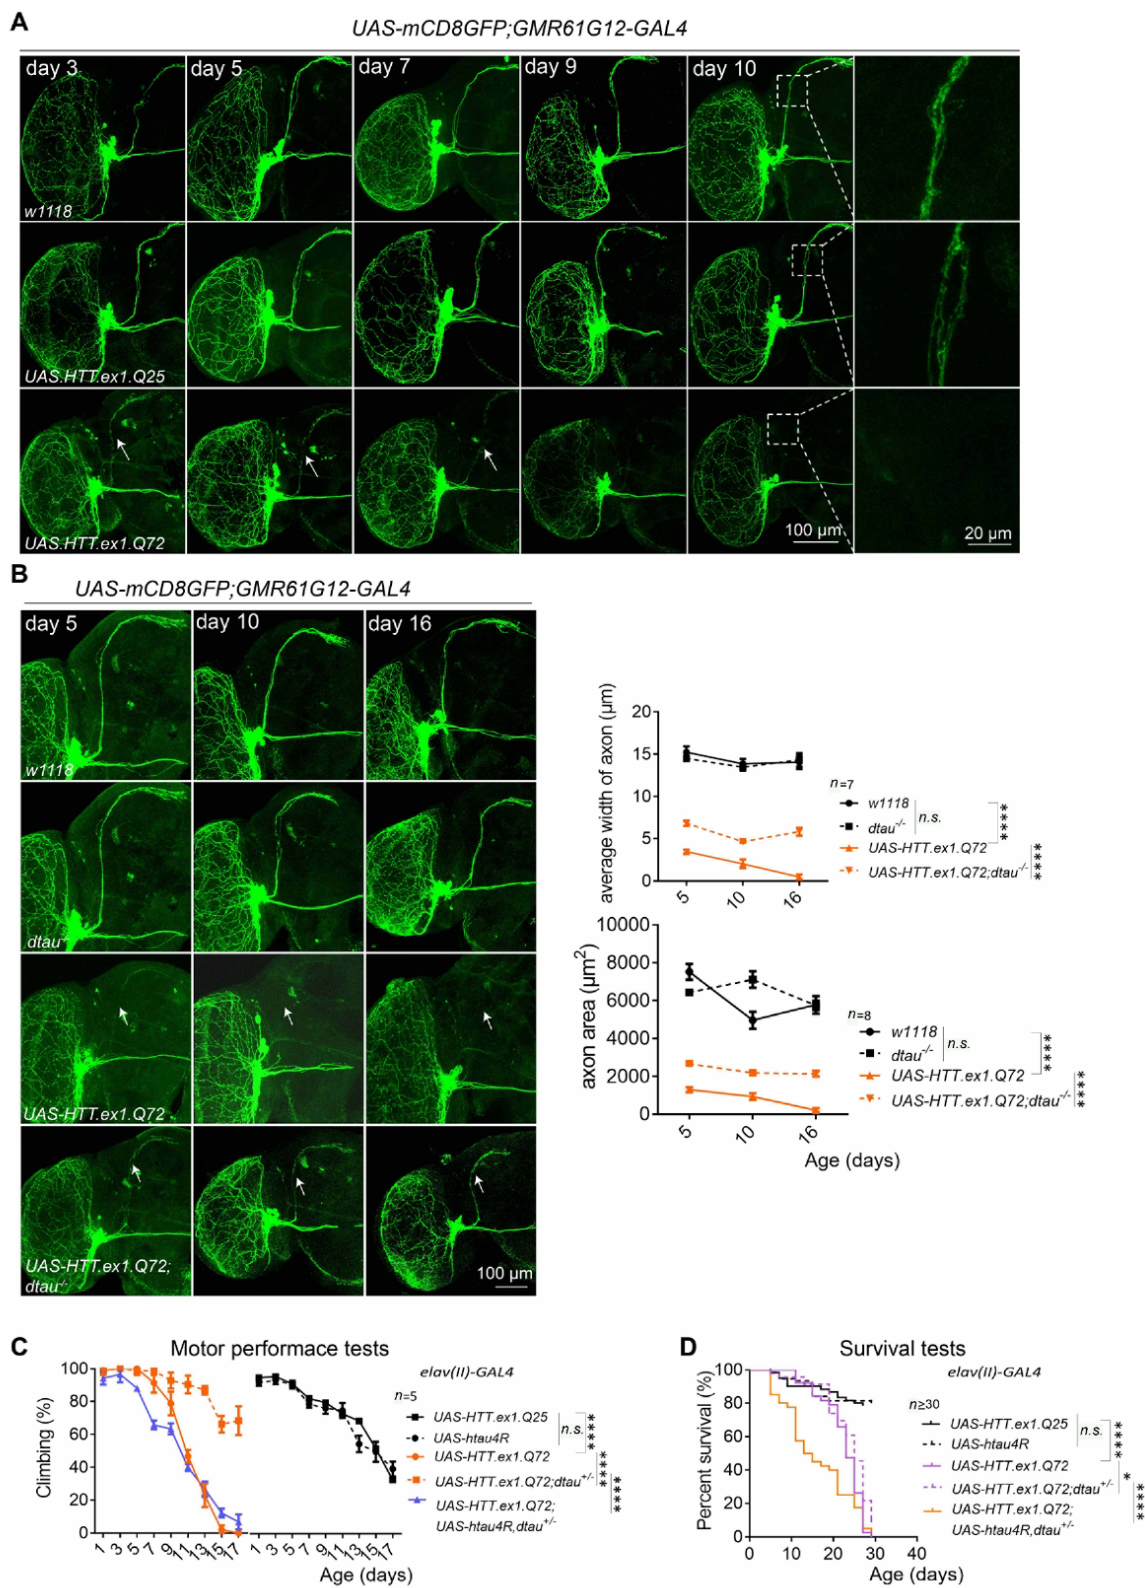

**Fig. S1 Homozygous or heterozygous *dtau*-knockout rescues neurodegeneration, motor function deficits, and shortened lifespan in HD flies.**

**A** Representative immunofluorescence images of whole-mount brains of flies of indicated genotypes at indicated ages showing *in vivo* neurodegeneration. Small ventral lateral clock neurons are labeled by mCD8GFP protein driven by *GMR61G12-GAL4*. HTT.ex1.Q72 or HTT.ex1.Q25 expression is also driven by the same *GAL4*. Arrows indicate a major axon bundle that degenerated in flies expressing HTT.ex1.Q72, compared to those expressing HTT.ex1.Q25 or w1118 control flies. Scale bars, 100  $\mu\text{m}$  and 20  $\mu\text{m}$ .

**B** As in **A**), but with or without *dtau* knockout (KO) as indicated. Right: quantification (mean and SEM) of axon bundle width and total axon area based on the GFP images (*n*, number of individual flies; statistical analysis, two-way ANOVA and Turkey's post-hoc test; scale bar, 100  $\mu\text{m}$ ).

**C** Motor performance tests measuring the climbing ability of flies with indicated genotypes and ages. (*n*, number of independently tested vials, each containing 15 virgin females (statistical analysis, two-way ANOVA and Turkey's post-hoc test).

**D** Lifespan measurements of flies with indicated genotypes. (*n*, number of individual flies; statistical analysis, log-rank tests).

In all plots in **A–C**, error bars indicate the mean  $\pm$  SEM; *n.s.*  $P > 0.05$ ,  $*P \leq 0.05$ ,  $****P \leq 0.0001$ .

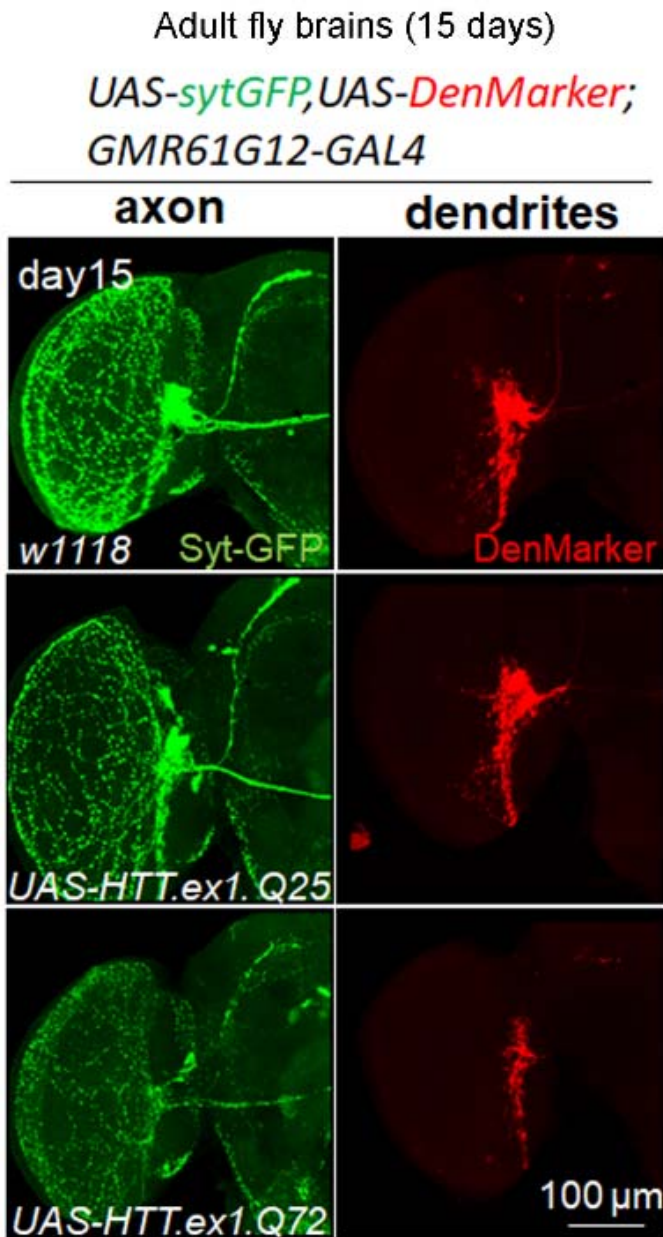

**Fig. S2 Validation of neurodegeneration detection by axon and dendrite markers.**

Representative immunofluorescence images of whole-mount brains from *Drosophila* of indicated genotypes. The expression of axon marker (syt.eGFP) or the dendrite marker (DenMarker) were driven by *GMR61G12-GAL4* in the sLNv clock neurons with HTT.ex1.Q25 or HTT.ex1.Q72 expression, or in the wild-type background (w1118).

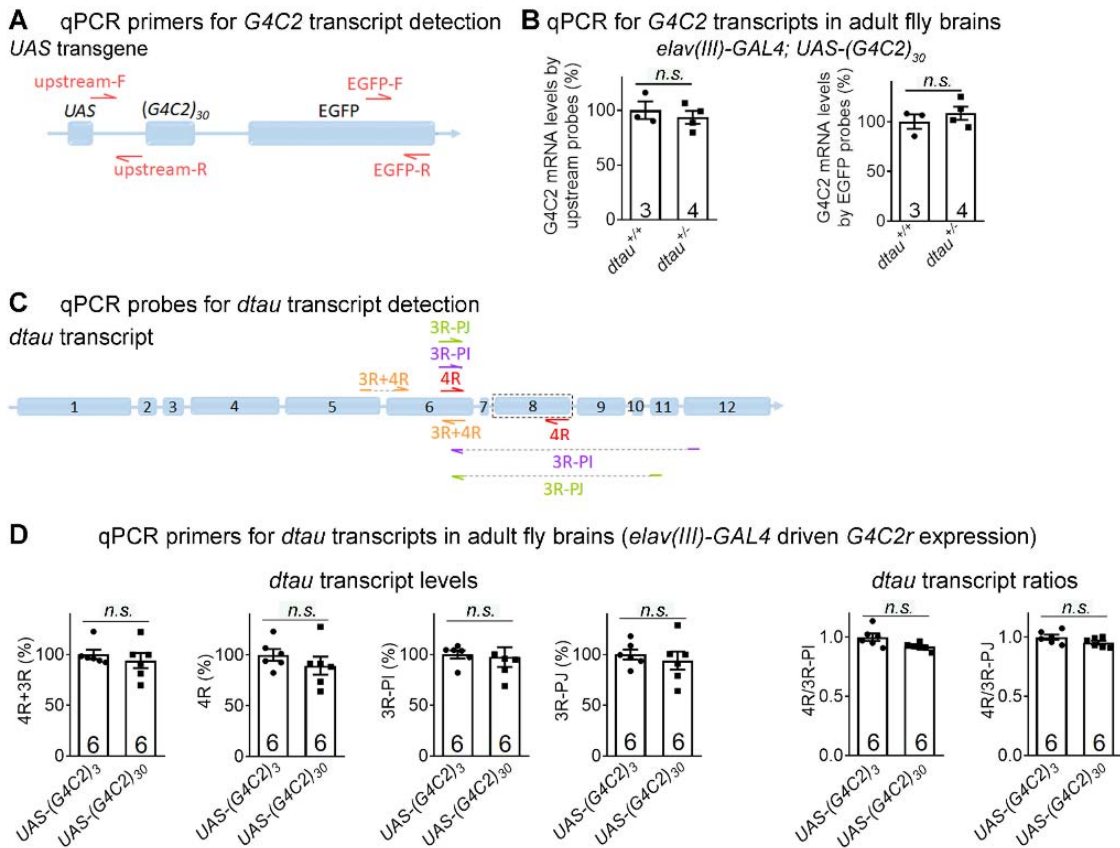

**Fig. S3 dtau and expanded *G4C2r* do not influence each other's mRNA levels.**

**A** Schematic of the qPCR primers for measurement of (*G4C2*)<sub>30</sub> transcript levels.

**B** qPCR measurements of (*G4C2*)<sub>30</sub> transcripts in brain tissues from flies of indicated genotypes using the indicated qPCR primers (*n*, number of individual flies; statistical analysis, two-tailed unpaired t test).

**C** Schematic of the qPCR primers for measurement of endogenous *dtau* transcript levels. Different *dtau* transcripts were detected by different sets of primers.

**D** qPCR measurements of the indicated *dtau* transcripts in brains from flies of the indicated genotypes (statistical analysis, two-tailed unpaired t test).

In all plots, bars indicate the mean  $\pm$  SEM; \* $P \leq 0.05$ , \*\* $P \leq 0.01$ , \*\*\* $P \leq 0.001$ , \*\*\*\* $P \leq 0.0001$ .

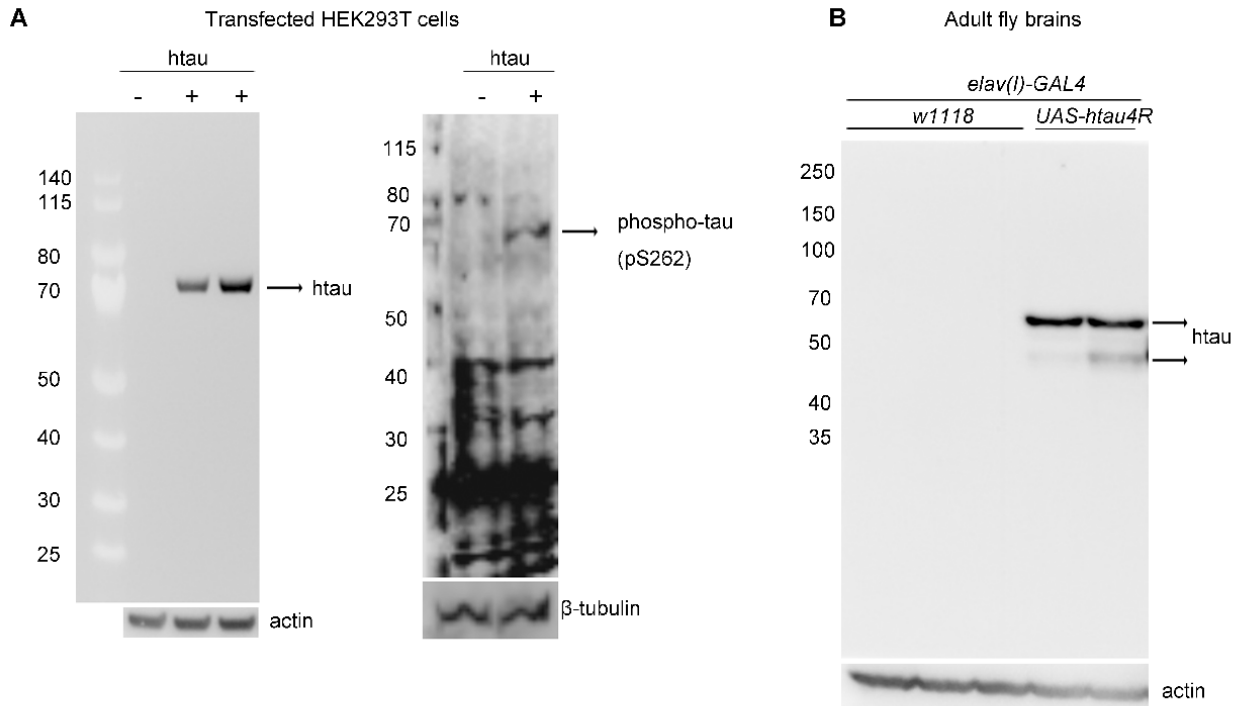

**Fig. S4 Validation of specificity of major antibodies.**

**A, B** Representative western blots of HEK293T and fly samples demonstrating the specificity of different tau antibodies (arrows, specific tau or phospho-tau bands). The specificity of AT8 and pS199 is shown in Fig. 3A, and thus is not presented here.
